# Supplementary material for: Concordance of microbial and visual health indicators of white-band disease in nursery reared Caribbean coral Acropora cervicornis
Source: PeerJ journal article supplement (doi:10.7717/peerj.15170), 2023-06-21

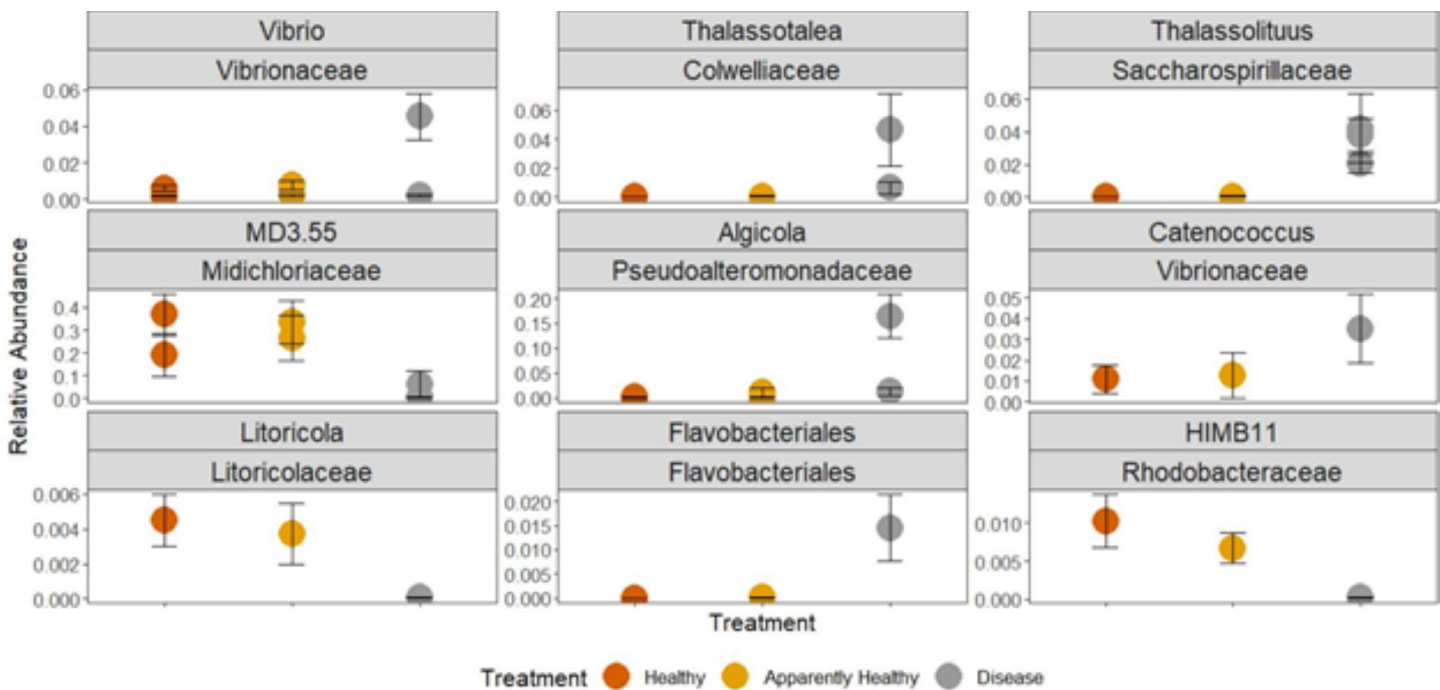

Supplement: FigureS3.pdf [file FigureS3.pdf]
