# Supplementary material for: Concordance of microbial and visual health indicators of white-band disease in nursery reared Caribbean coral Acropora cervicornis
Source: PeerJ. 2023 Jun 21;11:e15170. doi: 10.7717/peerj.15170 (PMC10290447; doi:10.7717/peerj.15170)
Supplement: Table S1 — Sample names and their associated metadata including quality filtered reads and number of sequences per sample. [file peerj-11-15170-s002.xlsx]

## Sheet: TableS1
Table S1. Metadata for coral microbiome samples and sequencing reads used in this study
SampleID	Treatment	Year	Group	Genotype	Quality-filtered reads	BioProject	SRA Accession	Number of Sequences
A1	AppHealthy	2019	1	BLACK	29457	PRJNA679809	SAMN16846909	29457
A12	AppHealthy	2019	12	BLUE	51849	PRJNA679809	SAMN16846910	51849
A2	AppHealthy	2019	2	YELLOW	61627	PRJNA679809	SAMN16846911	61627
A3	AppHealthy	2019	3	RED	3530	PRJNA679809	SAMN16846912	3530
A4	AppHealthy	2019	4	BLUE	21957	PRJNA679809	SAMN16846913	21957
A5	AppHealthy	2019	5	RED	9542	PRJNA679809	SAMN16846914	9542
A6	AppHealthy	2019	6	YELLOW	1127	PRJNA679809	SAMN16846915	1127
A7	AppHealthy	2019	7	BLUE	66442	PRJNA679809	SAMN16846916	66442
A8	AppHealthy	2019	8	BLACK	63741	PRJNA679809	SAMN16846917	63741
A9-V4-33	AppHealthy	2019	9	GREEN	207304	PRJNA679809	SAMN27388774	207304
D1P2	Healthy	2017	x	RED	39916	PRJNA308473	SAMN10223925	39916
D2P1	Healthy	2017	x	RED	47758	PRJNA308473	SAMN10223933	47758
D3P3	Healthy	2017	x	RED	85178	PRJNA308473	SAMN10223944	85178
G1P2	Healthy	2017	x	GREEN	116142	PRJNA308473	SAMN10223952	116142
G2T2	Healthy	2017	x	GREEN	54204	PRJNA308473	SAMN10223967	54204
G3P2	Healthy	2017	x	GREEN	112604	PRJNA308473	SAMN10223971	112604
H1	Healthy	2019	1	BLACK	45625	PRJNA679809	SAMN16846918	45625
H2	Healthy	2019	2	YELLOW	81278	PRJNA679809	SAMN16846920	81278
H3	Healthy	2019	3	RED	80941	PRJNA679809	SAMN16846921	80941
H4-V4-30	Healthy	2019	4	BLUE	232727	PRJNA679809	SAMN27388775	232727
H5-V4-15	Healthy	2019	5	RED	152133	PRJNA679809	SAMN27388776	152133
H6-V4-29	Healthy	2019	6	YELLOW	123316	PRJNA679809	SAMN27388777	123316
H7	Healthy	2019	7	BLUE	15371	PRJNA679809	SAMN16846924	15371
H8	Healthy	2019	8	BLACK	81486	PRJNA679809	SAMN16846925	81486
H9	Healthy	2019	9	GREEN	47519	PRJNA679809	SAMN16846926	47519
ND1	NearDisease	2019	1	BLACK	101034	PRJNA679809	SAMN16846927	101034
ND2	NearDisease	2019	2	YELLOW	37069	PRJNA679809	SAMN16846929	37069
ND3	NearDisease	2019	3	RED	105566	PRJNA679809	SAMN16846930	105566
ND4	NearDisease	2019	4	BLUE	126116	PRJNA679809	SAMN16846931	126116
ND5	NearDisease	2019	5	RED	106906	PRJNA679809	SAMN16846932	106906
ND6-V4-37	NearDisease	2019	6	YELLOW	107821	PRJNA679809	SAMN27388779	107821
ND7	NearDisease	2019	7	BLUE	72527	PRJNA679809	SAMN16846933	72527
ND8	NearDisease	2019	8	BLACK	128150	PRJNA679809	SAMN16846934	128150
ND9-V4-36	NearDisease	2019	9	GREEN	204810	PRJNA679809	SAMN27388780	204810
Y1T1	Healthy	2017	x	YELLOW	104725	PRJNA308473	SAMN10223984	104725
Y2S1	Healthy	2017	x	YELLOW	31311	PRJNA308473	SAMN10223990	31311
Y3S1	Healthy	2017	x	YELLOW	15688	PRJNA308473	SAMN10223999	15688
